# Supplementary material for: Neddylation of phosphoenolpyruvate carboxykinase 1 controls glucose metabolism
Source: PubMed Central journal article supplement — Cell Metab. 2023 Sep 5;35(9):1630–1645.e5. doi: 10.1016/j.cmet.2023.07.003 (PMC10487638; doi:10.1016/j.cmet.2023.07.003), 2023-09-05

**Figure 1.**

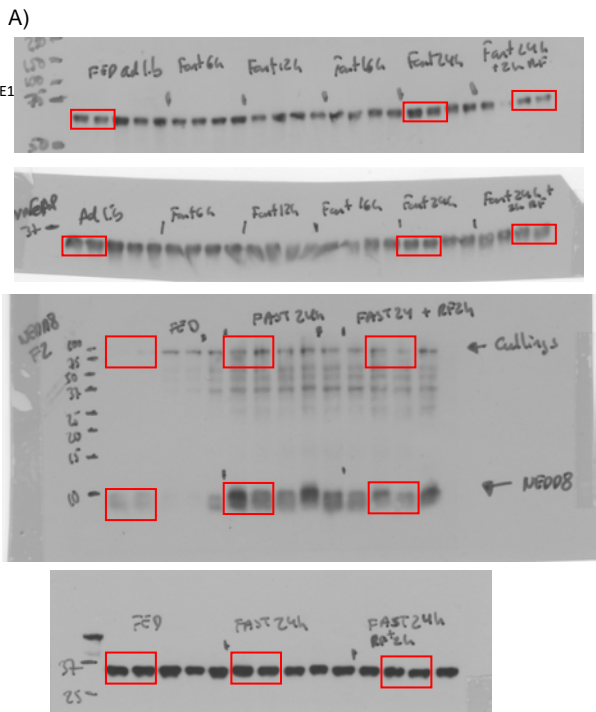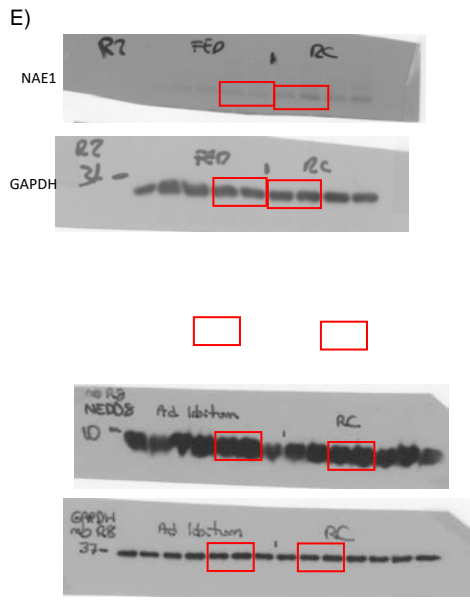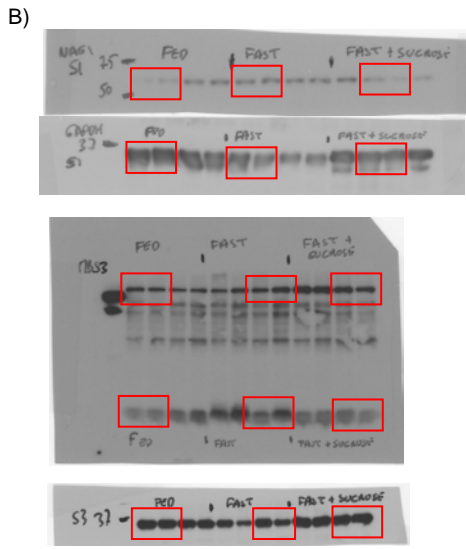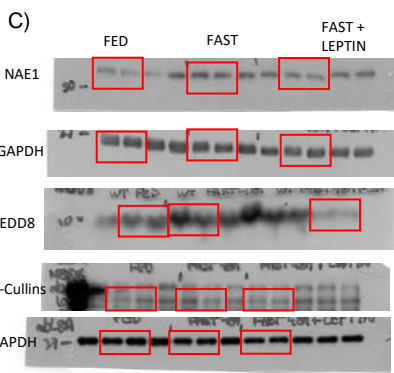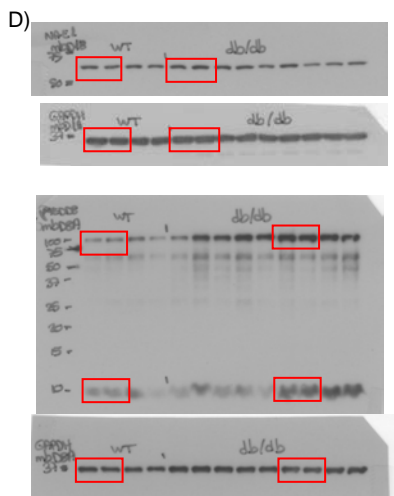

Figure 3.

F)

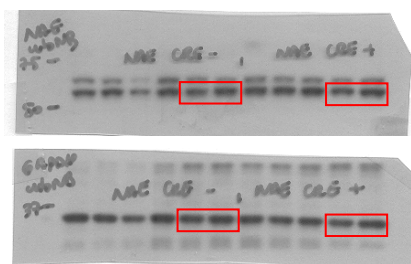

Figure 4.

A)

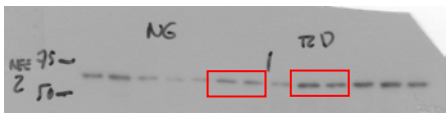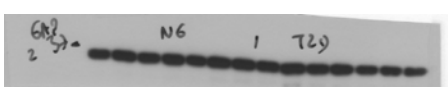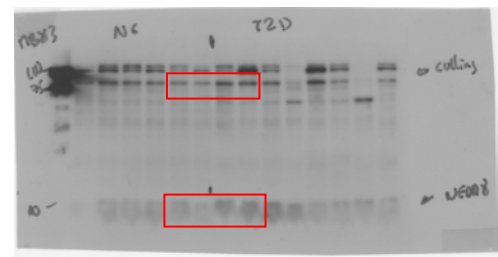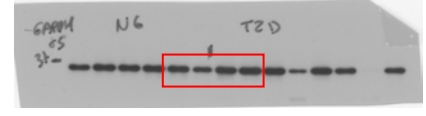

Figure 7.

A)

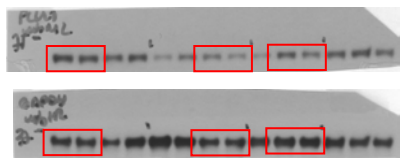

F)

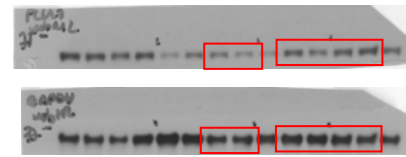

Supplementary figure 1.

D)

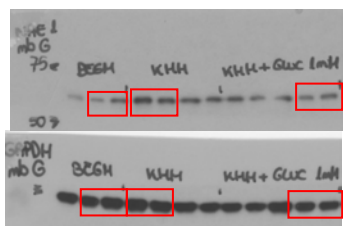

E)

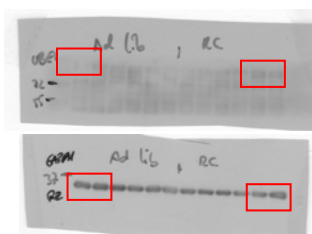

Supplementary figure 2.

C)

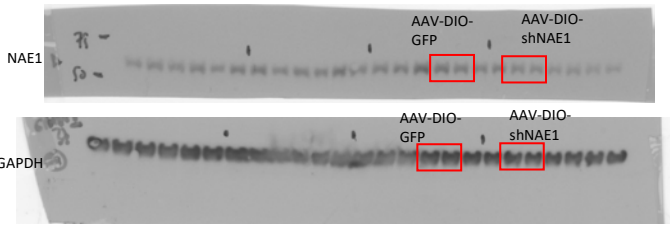

Supplementary figure 3.

A) B)

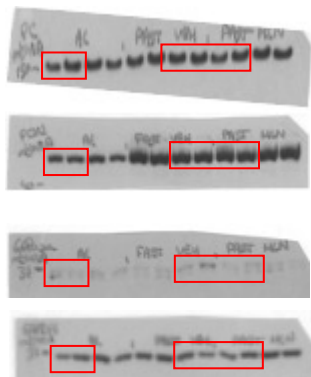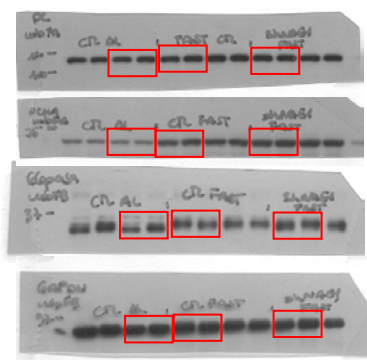

G) H)

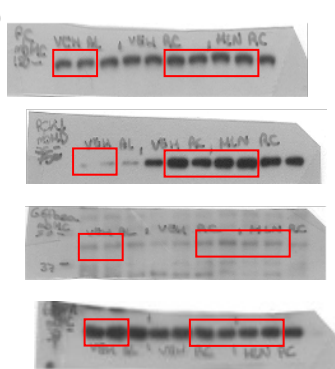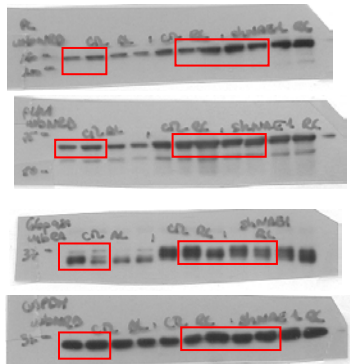

Supplementary figure 4.

B)

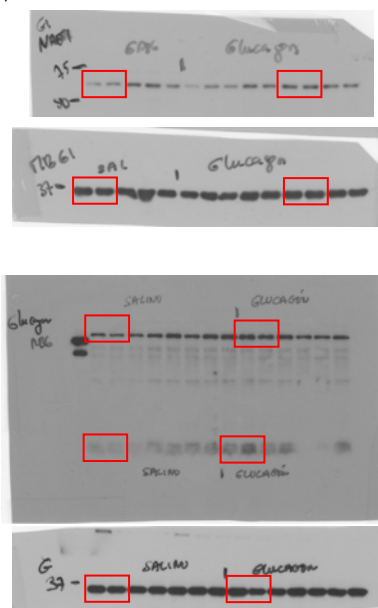

D)

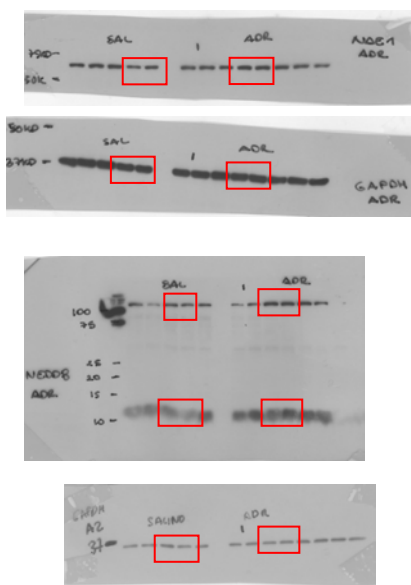

F)

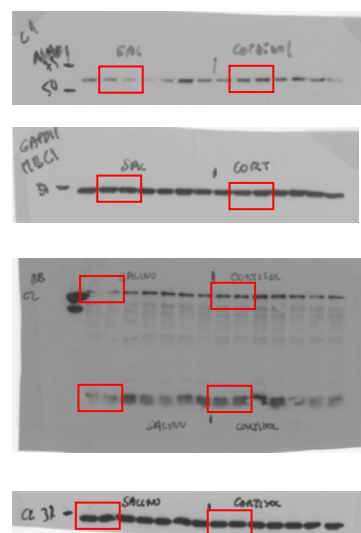

G)

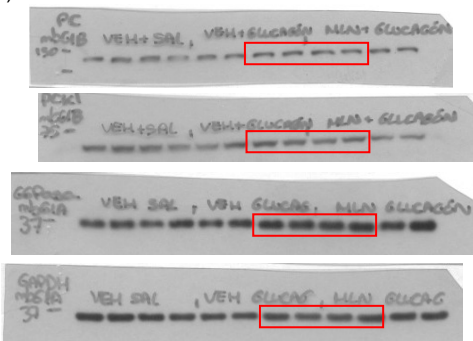

I)

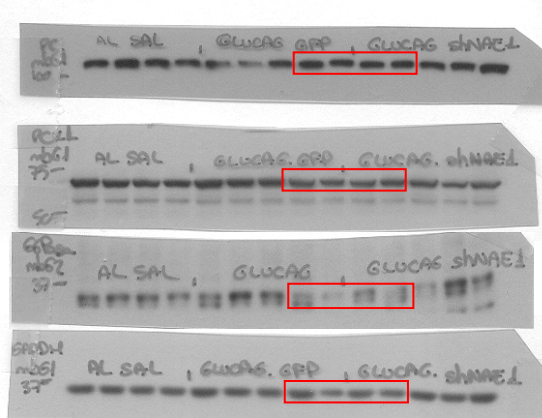

K)

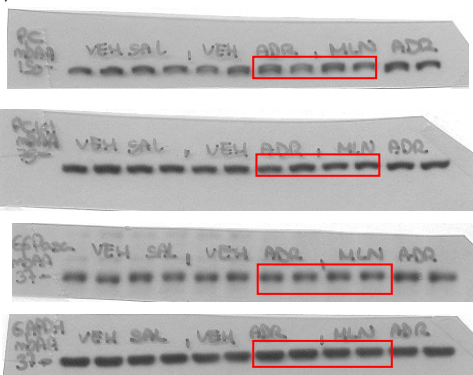

M)

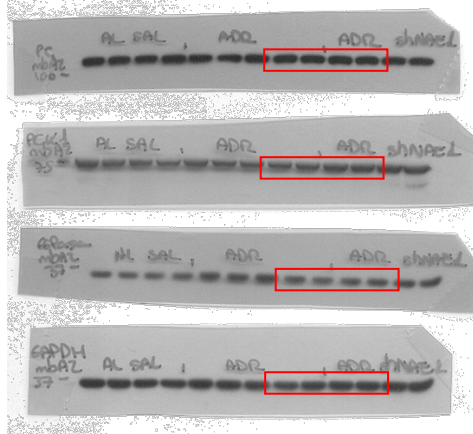

O)

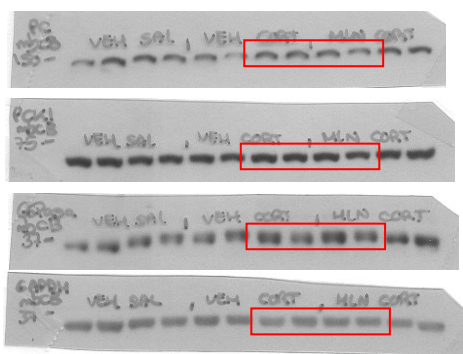

Q)

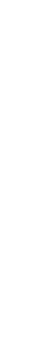

T)

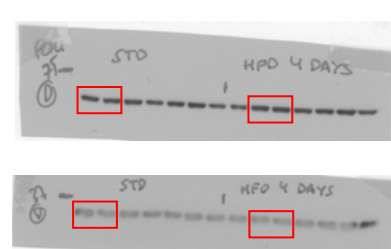

Supplement: mmc2.pdf [file mmc2.pdf]
